# Supplementary material
Source: ML conference proceedings conference paper supplement (https://openreview.net/forum?id=H5lOnzXhAY)
Supplement: supplementary_material [file attachment]

## Sheet: Sheet1
node_ins_recall	node_ins_precision	node_del_recall	node_del_precision	edge_ins_recall	edge_ins_precision	edge_del_recall	edge_del_precision
0.15	1	1	0.96	0.88	0.97	1	0.97
